# Supplementary material for: Chromatin reconstruction during mouse terminal erythropoiesis
Source: PubMed Central journal article supplement — iScience. 2022 Nov 11;25(12):105554. doi: 10.1016/j.isci.2022.105554 (PMC9709226; doi:10.1016/j.isci.2022.105554), 2022-11-11
Supplement: mmc1.pdf [file mmc1.pdf]

iScience, Volume 25

## **Supplemental information**

### **Chromatin reconstruction during mouse terminal erythropoiesis**

**Honghao Bi, Ye Hou, Juan Wang, Zongjun Xia, Dongmei Wang, Yijie Liu, Haiyan Bao, Xu Han, Kehan Ren, Ermin Li, Feng Yue, and Peng Ji**

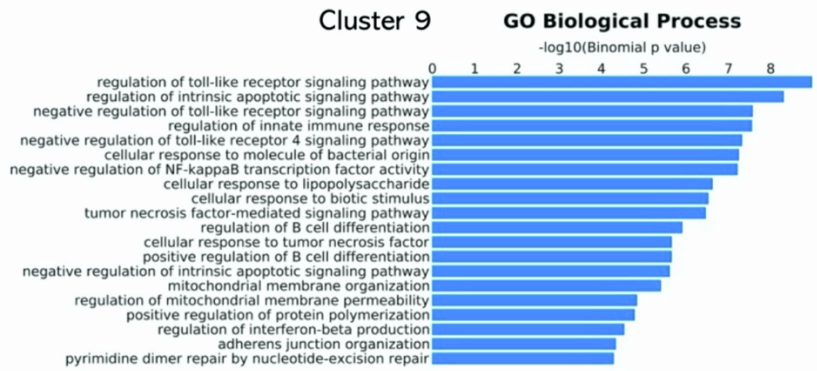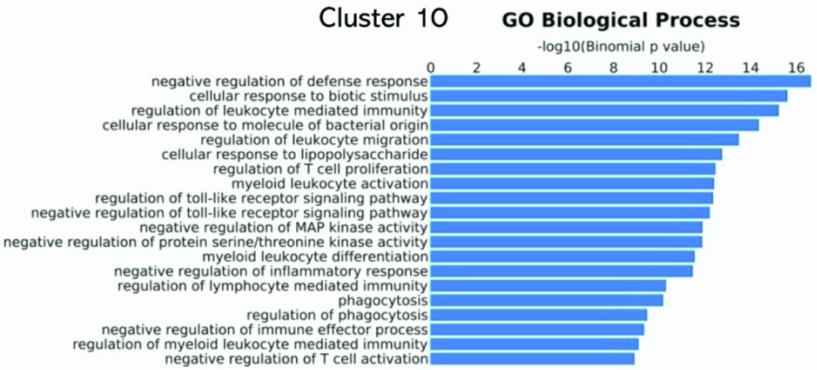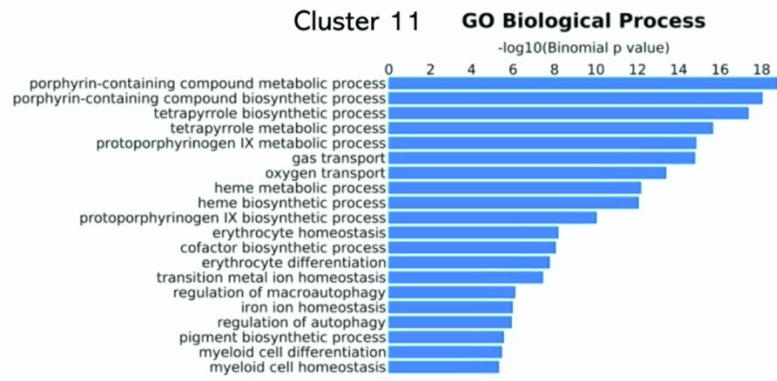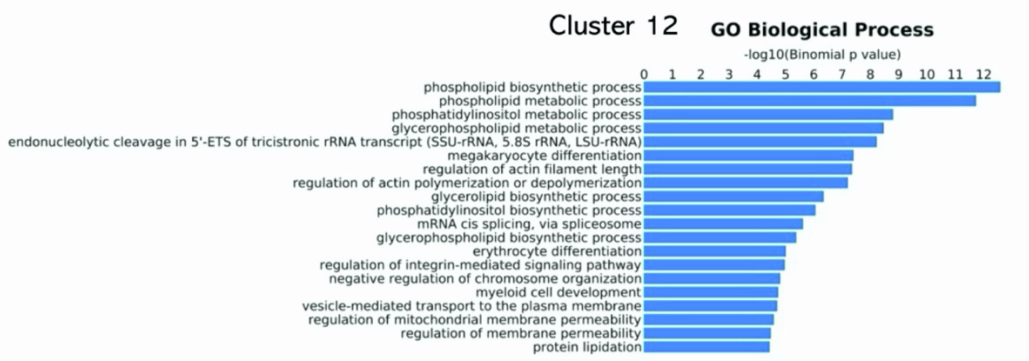

**Supplemental Figure 1. GREAT ontology analysis of the clusters with differential accessibility from the ATAC-seq assay. Related to Figure 3.**

DMSO vs 0 h down 2 fold 1061 genes

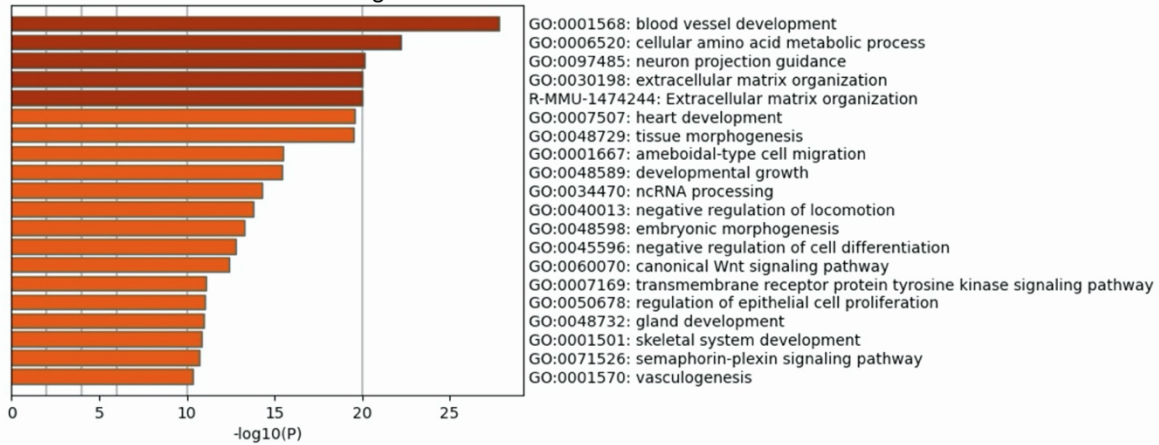

DMSO vs 0 h up 2 fold 964 genes

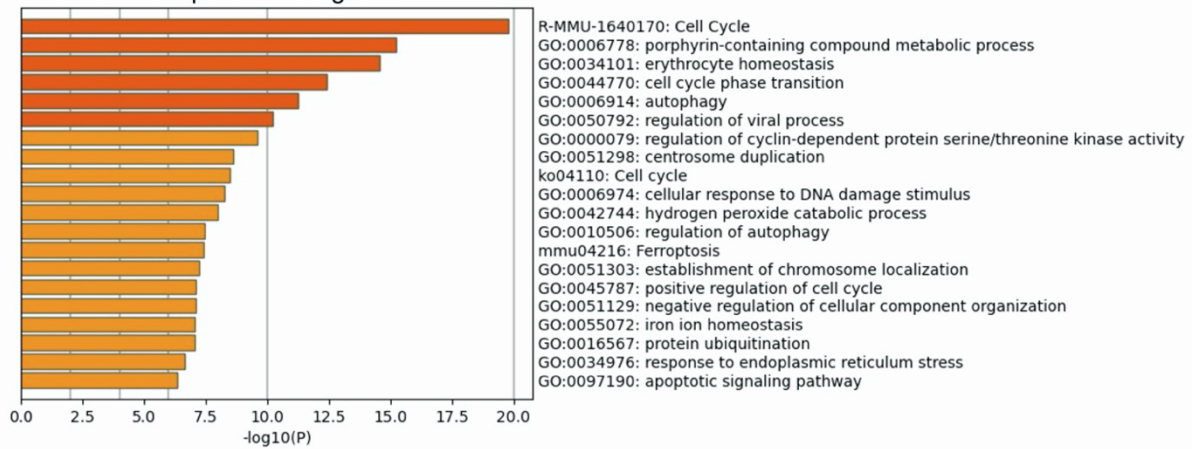

**Supplemental Figure 2. Gene ontology analysis of the genes down or up regulated in DMSO treated cells.** Genes that are down or up regulated 2-fold are included in the analyses.

Related to Figure 4.
